# Supplementary material for: The response of small boreal catchments to extreme weather event: Hurricane Larry
Source: Copernicus journal article supplement (doi:10.5194/egusphere-2024-3843), 2025-01-21
Supplement: Supplementary file [file egusphere-2024-3843-AC2-supplement.pdf]

The manuscript, entitled “The response of small boreal catchments to extreme weather event: Hurricane Larry” by Heerah et al. evaluated DOM and iron concentration after 2021 Hurricane Larry in Newfoundland, and found that the forests and peatlands may have capacities to buffer DOC and colour, while wetlands may buffer the increase in iron concentrations. The study provides insights into impacts of extreme weather events on water quality in boreal regions. However, I do have some concerns and suggestions for improvement, outlined below.

**General comments:**

1. This study may have a major issue of pseudoduplication, which affects the validity of the statistical analyses within each watershed. For each watershed, only one time sample collection was conducted before and after the hurricane, respectively. Regardless of the number of samples collected per event, applying statistical analyses to compare the changes in colour, DOC, iron etc., before and after the hurricane within a single watershed is problematic because these samples are not independent. To address this, the study could combine all samples into two groups: samples from three watersheds before the hurricane vs. samples from three watersheds after the hurricane. This approach would mitigate the pseudoreplication issue and ensure more robust statistical results.

*Reply: We do not believe there is an issue of pseudoduplication in this paper. In our initial statistical analysis, we did combine the measurements into a before and after group and conducted t-test between them to assess statistical relevance, which was discussed on line 145.*

*Line 145 – “Both temperature and pH (Table 1) exhibited statistically significant decreases in all three catchments between sampling times (t-tests,  $p = 0.0017$ ,  $p=0.0499$ , respectively)”*

*To address this miscommunication of statistical analysis we have moved line 145 to line 151. We acknowledge that without the new statistical analysis method section, the treatment of data was not clear. Based on reviewer 2 and reviewer 1 comments, the description for the statistical analysis has been found to not be clear. A new section, section 2.6(lines128-134, page 6) has been added to the methods to attempt to correct this miscommunication. This new section can be seen in the response to your method comments.*

*While compiling this information we re-examined our statistical approaches and have decided that utilizing a two tail - two sample t-test was not the most appropriate statistical test to assess the increase in parameters after the hurricane. Instead, we have now conducted a one tail- paired t-test and report these new results in this manuscript. These tests show statistical relevance in all parameters except DOC. The new results are discussed in section 3.1 (lines 153-155)*

*Amended Lines 153-155: “Increases in DOC, iron concentrations and  $a_{350}$  were seen in all rivers as shown in Fig.3. Fe and  $a_{350}$  increases were found to be statistically significant (t-test,  $p = 0.0132$ ,  $p = 0.0389$ , respectively) with DOC failing to achieve statistical relevance ( $p = 0.9821$ ).”*

*Additionally, we do not believe there is an issue of pseudoduplication in this paper based on sampling time. While there are only two time points in this study in an environmental context the combination of time and water flow makes samples collected in the same watershed independent of each other. The water flowing through the river 24 hours after the last sampling time is considered independent of the previous sampling due to it being considered a different water mass. As the river*

*flows chemical properties can change as a result of weather changes and differences in stage height.*

2. Regardless of whether the above pseudoreplication issue is valid, another major concern is that some conclusions are not supported by statistically significant results. For instance, the study suggests that a high percentage of forest and peatlands buffered against increases in DOC and colour, with wetlands buffering an increase in iron concentrations. However, Table 2 does not indicate any statistically significant correlations supporting these statements. Similarly, the higher DOM properties observed in Figure 3 are not statistically validated.

*Reply: The lack of statistically relevant results has been pointed out in reviewer 1 comments. We agree with reviewer 1 that the small sample size greatly hinders achieving statistically relevant results and the discussion should rather focus on solely on the correlation strength. This is further emphasized by the statistically relevant increases in parameters discussed in the replies above. The discussion of table 2 has thus been amended to remove p values and focusing solely on correlation strength. It is important to note that lines 158-160 gives the caveat that the results discussed did not meet the p value threshold. However, we strongly believe this is due to the low degrees of freedom used as opposed to there being no actual change in concentrations.*

#### **Specific comments:**

L47-50: Please briefly describe how forests and peat barrens regulate DOM and iron.

“Catchments in Newfoundland, Canada are dominated by peat barrens and boreal forest (Latifovic et al., 2017), both rich in organic carbon and iron. DOM from boreal and peatland ecosystems have been identified as important for biogeochemical nutrient cycling (Krachler et al., 2010; Kritzberg et al., 2014; Worrall et al., 2006). This DOM can form complexes with iron more resistant to flocculation allowing greater terrestrial inputs into the coastal environment (Heerah and Reader, 2022; Herzog et al., 2020; Krachler et al., 2015; Kritzberg et al., 2014).”

*Reply: DOM is formed from the breakdown of biological material in the environment. In the terrestrial environment the major source of biological material is the vegetation present on the land. In the boreal environment where peat and forest dominate as sources of vegetation, they will be the dominant inputs in the DOM pool. Peat and boreal forest thus serve to regulate DOM through its production of biomass. The regulation of iron from peat barrens and forest are slightly less direct. Terrestrial iron can come from either microbial sources or the chemical weathering of mineral in the soil and subsequent mobilisation into the waterways. The specific ways how boreal forest and peat barrens regulate the delivery of iron is a current knowledge gap in the literature as these environments are able to transport more iron into the marine environment than rivers from other regions. This is touched upon in line 50. Peat barrens regulate the concentration of iron as they are also anoxic environments, and Fe has been found to accumulate in anoxic environments as they can remain in the soluble Fe (II) form as opposed to precipitating out as an iron hydroxide. The soils in boreal forest have also been found to be acidic than temperate forest allowing more Fe (II) to exist in the soils. Lines 49 -54 have been added to the manuscript to address this comment.*

“The acidic soils in boreal forest and the anoxic conditions present in peat barrens can allow for the accumulation iron in the soils (Abesser et al., 2006; Kaal et al., 2022). DOM from boreal and peatland ecosystems have been identified as important for biogeochemical nutrient cycling (Krachler et al., 2010;

Kritzberg et al., 2014; Worrall et al., 2006). Peat and boreal forest are the dominant sources of biological material to the DOM pool in these environments producing DOM enriched in aromatics, lignins, humic acids and humic ligands (Krachler et al., 2005; Worrall et al., 2006).”

Section 2.1: How many samples were collected before and after the hurricane in each stream?

Reply: This information has been added into section 2.1 at line 88.

“Two 500 ml acid washed polycarbonate bottles were collected at each site before and after landfall. The bottles were transported on ice back to the lab where they filtered the day of collection ashed GF/F filters (Whatman, nominal pore size 0.7 µm). The filtered sample was then subdivided for dFe, DOC, and  $a_{350}$ , measurements. BOD samples were conducted with un-filtered sample water.”

L84-85: Can you show the gauged sizes of those three watersheds?

Reply: The description of the watershed sizes and their landcover breakdown is discussed in section 2.2 on lines 103-105. Seal Cove brook is 53.6 km<sup>2</sup>, South River near Holyrood is 17.3 km<sup>2</sup>, and St Shotts River near Trepassey is 15.5km<sup>2</sup>.

Figure 1: Can you insert three sub-figures to show land use types of each watershed?

Reply: The three watersheds land cover is broken down in section 2.2 in lines 103-106 focusing on the relevant land cover types discussed in this study. This information can be added as a table if the reviewer finds it pertinent information to include. The authors believe adding this data visually to Figure 1 may reduce readability of the figure. Lines 103-106 do not give the full breakdown of the landcover but cover 86.3% of SC’s catchment, 80.02% of SR’s and 86.02% of SS’s. The remaining breakdown is outlined below:

| Landcover Type | Seal Cove | South River | St. Shott’s |
|----------------|-----------|-------------|-------------|
| Lichen- moss   | 0.40%     | 3.31%       | 1.68%       |
| Barren land    | 0.04%     | 0.90%       | 0%          |
| Water          | 12.87%    | 7.36%       | 11.77%      |
| Urban          | 0.33%     | 2.32%       | 0.52%       |
| Grassland      | 0%        | 0.096%      | 0%          |

L104: Include the relevant equation. In addition, I did not see any analyses about this index.

Reply: The relevant equation has been added below Line 115. See the following equation below as well.

$$RB \text{ index} = \frac{\sum_{i=1}^n |q_i - q_{i-1}|}{\sum_{i=1}^n q_i}$$

The result of the indexes was added to Table 1. Rather than reproduce the table in this reply. The numbers are as follows South River (0.3872), Seal Cove (0.37722), and St. Shotts (1.5719). A short

*discussion of the results of the index has been added and can be found in Line 159- 160 and lines 190-194.*

*Lines 159 -160: “Discharge is fairly low not exceeding 1m<sup>3</sup>/s at any point in the sample period (Table 1). The RB index can be used to compare the river’s response to storm events.”*

*Lines 190-194: “The difference in flashiness is expected based on the size, land cover differences and catchment complexity (Baker et al., 2004). SC, as the largest of the three catchments was the least flashy incorporating the massive increase in precipitation. SR had the highest increases in fluxes of material following landfall despite being the second largest catchment. The dramatic increase in flux highlights that in addition to catchment size, landcover plays a major role in catchment response.”*

Methods section:

(1) I would suggest adding a subsection to provide more information about the Hurricane Larry, for example, wind speed, amount the rainfall, etc. This information helps understand the severity of the hurricane and its consequence on water quality.

*Reply: This section was added at line 67.*

*“Hurricane Larry reached Newfoundland as a category 1 hurricane with a maximum sustained wind speed of 120km/hr and gusts reaching a maximum of 180km/hr. Rainfall was around 25 to 35mm over a very short period of time causing localized flooding with significant storm surges with waves reaching 3.6 m (Brown, 2021)”*

(2) What statistical methods were used?

*A section describing the statistical tests used has been added section 2. 6, based on earlier comments going from line 142-148, page 7.*

#### *“2.6 Statistical Analysis*

*All statistics were carried out in MATLAB 2020A. One tail paired t-tests were conducted on each parameter for samples before and after landfall, catchments were combined forming a before and after group. T-tests were conducted using a confidence interval of 0.05. The t-test showed if the changes observed in parameters were statistically different from one another. The  $\Delta$  of parameters were compared with land cover using Pearson’s correlations test. The  $\Delta$ s for each parameter were grouped together along with an individual landcover type to carry out the analysis, reducing statistical power, the p for the correlation analysis is reported but p-values are not due to the small sample size and low degrees of freedom.*

L141: this should be Table 1.

*Reply: addressed*
